# Supplementary material for: Electronic tuning of Ni–Fe–Co oxide/hydroxide as highly active electrocatalyst for rechargeable Zn–air batteries
Source: Royal Society of Chemistry journal article supplement (doi:10.1039/d2dt03682g), 2023-01-01
Supplement: d2dt03682g1.pdf [file d2dt03682g1.pdf]

## Supporting information

### Electronic Tuning of Ni-Fe-Co Oxide/Hydroxide as Highly Active Electrocatalysis for Rechargeable Zinc–Air Batteries

Xiaolong Guo<sup>a,\*</sup>, Xinyu Zhang<sup>a</sup>, Yong Wu<sup>c</sup>, Yuci Xin<sup>a</sup>, Dongmei Li<sup>a</sup>, Yuxin Zhang<sup>b,\*</sup>, Peng Yu<sup>a,\*</sup>

a)Chongqing Key Laboratory of Photo-Electric Functional Materials, College of Physics and  
Electronic Engineering, Chongqing Normal University, Chongqing 401331, China

b) College of Materials Science and Engineering, Chongqing University, Chongqing 400044,  
China

c) Institute of Materials & Laboratory for Microstructure, Shanghai University, Shanghai 200072,  
China

\*Corresponding author

E-mail addresses: guoxiaolong@cqu.edu.cn (X. Guo) ; zhangyuxin@cqu.edu.cn (Y. Zhang),

pengyu@cqu.edu.cn (P. Yu)

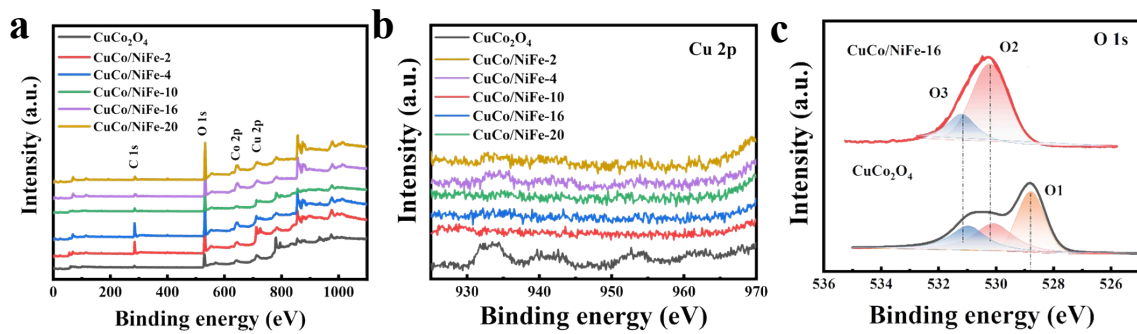

**Fig. S1** (a) XPS full spectrum of the electrocatalysts. XPS spectra of (b) Cu 2p and (c) O 1s for as-prepared catalysts.

**Table. S1** The fitted O ions ratio in the XPS.

| Catalysts                        | O1(at.%) | O2(at.%) | O3 (at.%) |
|----------------------------------|----------|----------|-----------|
| CuCo <sub>2</sub> O <sub>4</sub> | 39.18    | 33.62    | 27.20     |
| CuCo/NiFe-2                      | 28.36    | 34.51    | 37.13     |
| CuCo/NiFe-4                      | 11.82    | 37.85    | 50.33     |
| CuCo/NiFe-10                     | 0        | 29.94    | 70.06     |
| CuCo/NiFe-16                     | 0        | 26.42    | 73.58     |
| CuCo/NiFe-20                     | 0        | 54.28    | 45.72     |

**Table. S2** OER catalytic performance comparison for as-prepared catalysts.

| Catalysts                        | Overpotential at 10 mA cm <sup>-2</sup> (mV) | Tafel slope (mV dec <sup>-1</sup> ) | Interface resistance (ohm) |
|----------------------------------|----------------------------------------------|-------------------------------------|----------------------------|
| CuCo <sub>2</sub> O <sub>4</sub> | 342                                          | 68                                  | 5.90                       |
| CuCo/NiFe -2                     | 297                                          | 55                                  | 10.50                      |
| CuCo/NiFe-4                      | 292                                          | 43                                  | 3.10                       |
| CuCo/NiFe-10                     | 284                                          | 39                                  | 3.20                       |
| CuCo/NiFe-16                     | 251                                          | 31                                  | 2.50                       |
| CuCo/NiFe-20                     | 295                                          | 40                                  | 5.23                       |

**Table. S3** Comparison of OER activity of CuCo<sub>2</sub>O<sub>4</sub>-based electrocatalysts in alkaline media.

| Catalysts                                           | Method            | Electrolyte | Onset overpotential (mV) | Tafel slope (mV/dec) | Overpotential (mV)               | Ref.         |
|-----------------------------------------------------|-------------------|-------------|--------------------------|----------------------|----------------------------------|--------------|
| CuCoO nanowire                                      | Hydrothermal      | 1 M KOH     | 250                      | 68                   | 270<br>(20 mA cm <sup>-2</sup> ) | [1]          |
| sCuCo <sub>2</sub> O <sub>4</sub> /rGo nanoparticle | Hydrothermal      | 1 M KOH     | -                        | 64                   | 360<br>(10 mA cm <sup>-2</sup> ) | [2]          |
| CuCo <sub>2</sub> O <sub>4</sub> @CQD Nanowires     | Hydrothermal      | 1 M KOH     | 230                      | 64                   | 290<br>(20 mA cm <sup>-2</sup> ) | [3]          |
| CuCo <sub>2</sub> O <sub>4</sub> Polyhedron         | Hydrothermal      | 1 M KOH     | 330                      | 90.3                 | 420<br>(10 mA cm <sup>-2</sup> ) | [3]          |
| CuCo <sub>2</sub> O <sub>4</sub> Nanochain          | Hydrothermal      | 1 M KOH     | 270                      | 63.3                 | 351<br>(10 mA cm <sup>-2</sup> ) | [4]          |
| CuCo <sub>2</sub> O <sub>4</sub> nanoparticle       | Hydrothermal      | 1 M KOH     | -                        | 67                   | 400<br>(10 mA cm <sup>-2</sup> ) | [4]          |
| CuCo <sub>2</sub> O <sub>4</sub> Nanosheet          | Electrodepositing | 1 M KOH     | 240                      | 64                   | 260<br>(20 mA cm <sup>-2</sup> ) | [5]          |
| CuCo <sub>2</sub> O <sub>4</sub> Nanosheet          | Hydrothermal      | 1 M KOH     | -                        | 117                  | 294<br>(20 mA cm <sup>-2</sup> ) | [6]          |
| CuCo <sub>2</sub> O <sub>4</sub> /NF                | Hydrothermal      | 1 M KOH     | -                        | 50                   | 296<br>(20 mA cm <sup>-2</sup> ) | [7]          |
| CuCo <sub>2</sub> O <sub>4</sub>                    | Hydrothermal      | 1 M KOH     | -                        | 64                   | 360<br>(10 mA cm <sup>-2</sup> ) | [8]          |
| CuCo <sub>2</sub> O <sub>4</sub> /Nr GO             | Hydrothermal      | 1 M KOH     | -                        | 101                  | 460<br>(10 mA cm <sup>-2</sup> ) | [9]          |
| CuCo/NiFe -16                                       | Hydrothermal      | 1 M KOH     | 230                      | 31                   | 251<br>(10 mA cm <sup>-2</sup> ) | Present work |

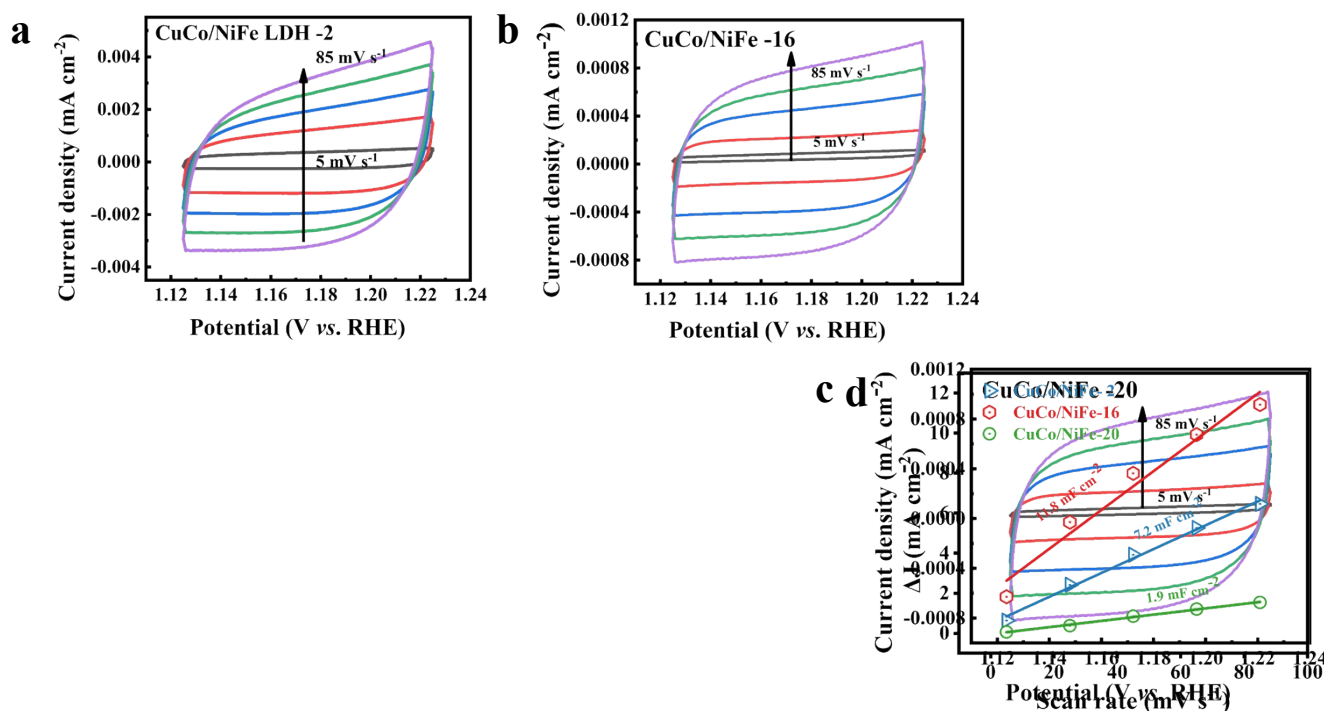

**Fig. S2** (a-c) CV curves of CuCo/NiFe-2, CuCo/NiFe-16 and CuCo/NiFe-20 catalysts. (d) The corresponding double layer capacitance.

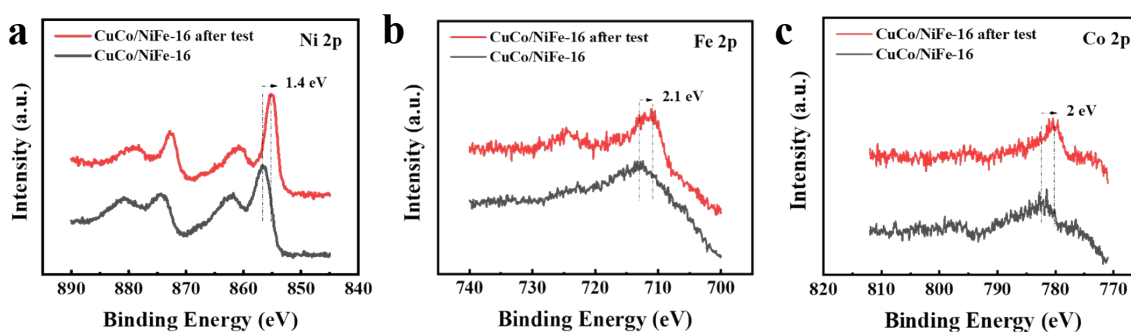

**Fig. S3** XPS spectra of the CuCo/NiFe-16 after long time reaction (a) Ni 2p, (b) Fe 2p, (c) Co 2p.

After OER test, all  $2p_{3/2}$  peak centers occur shift with various degree (Ni  $2p_{3/2}$ :  $\sim 1.4$  eV; Fe  $2p_{3/2}$ :  $\sim 2.1$  eV; Co  $2p_{3/2}$ :  $\sim 2$  eV) (**Fig. S3**). The shifts after OER indicate that both Ni, Fe and Co ions probably participated in the OER process. According to the LSV curves (**Fig. 4a**), the catalysts firstly experience the oxidation process, where NiFe LDH and  $\text{CuCo}_2\text{O}_4$  oxidized to NiFeOOH and CoOOH [10, 11], respectively, and then occur OER reaction. However, the obtained valence state of metal cation will recover after OER reaction due to the unstable high valence state. Moreover, the recovering of valences are not completely consistent with the valences before OER.

## References

- [1] M. Kuang, P. Han, Q. Wang, J. Li, G. Zheng, CuCo Hybrid Oxides as Bifunctional Electrocatalyst for Efficient Water Splitting, *Adv. Funct. Mater.* 26 (2016) 8555-8561.
- [2] S.K. Bikkarolla, P. Papakonstantinou, CuCo<sub>2</sub>O<sub>4</sub> nanoparticles on nitrogenated graphene as highly efficient oxygen evolution catalyst, *J. Power Sources* 281 (2015) 243-251.
- [3] G. Wei, J. He, W. Zhang, X. Zhao, S. Qiu, C. An, Rational Design of Co(II) Dominant and Oxygen Vacancy Defective CuCo<sub>2</sub>O<sub>4</sub>@CQDs Hollow Spheres for Enhanced Overall Water Splitting and Supercapacitor Performance, *Inorg. Chem.* 57 (2018) 7380-7389.
- [4] A. Karmakar, S.K. Srivastava, Interconnected Copper Cobaltite Nanochains as Efficient Electrocatalysts for Water Oxidation in Alkaline Medium, *ACS. Appl. Mater. Interfaces* 9 (2017) 22378-22387.
- [5] S.M. Pawar, B.S. Pawar, P.T. Babar, A.T.A. Ahmed, H.S. Chavan, Y. Jo, S. Cho, J. Kim, B. Hou, A.I. Inamdar, S.N. Cha, J.H. Kim, T.G. Kim, H. Kim, H. Im, Nanoporous CuCo<sub>2</sub>O<sub>4</sub> nanosheets as a highly efficient bifunctional electrode for supercapacitors and water oxidation catalysis, *Appl. Surf. Sci.* 470 (2019) 360-367.
- [6] A.T.A. Ahmed, B. Hou, H.S. Chavan, Y. Jo, S. Cho, J. Kim, S.M. Pawar, S. Cha, A.I. Inamdar, H. Kim, H. Im, Self-Assembled Nanostructured CuCo<sub>2</sub>O<sub>4</sub> for Electrochemical Energy Storage and the Oxygen Evolution Reaction via Morphology Engineering, *Small* 14 (2018) 1800742.
- [7] X. Q. Du, X. S. Zhang, Z. F. Xu, Z. Yang, Y. Q. Gong, CuCo<sub>2</sub>O<sub>4</sub> microflowers catalyst with oxygen evolution activity comparable to that of noble metal, *International Journal of Hydrogen Energy*, 43 (10) (2018) 5012-5018.
- [8] Y. K. Zhao, X. C. Zhou, Y. Ding, J. W. Huang, M. Zheng, W. C. Ye, A study of photocatalytic, chemical, and electrocatalytic water oxidation on ACo<sub>2</sub>O<sub>4</sub> (A=Ni, Cu, Zn) samples through doping different metal ions, *Journal of Catalysis*, 338 (2016) 30-37.
- [9] S. K. Bikkarolla and P. Papakonstantinou, CuCo<sub>2</sub>O<sub>4</sub> nanoparticles on nitrogenated graphene as highly efficient oxygen evolution catalyst, *Journal of Power Sources*, 281 (2015) 243-251.
- [10] S. H. Hsu, S. F. Hung, H. Y. Wang, F. X. Xiao, L. Zhang, H. Yang, H. M. Chen, J. M. Lee, B. Liu, *Small Method*, 2 (2018) 1800001.
- [11] J. Zhang, J. Liu, L. Xi, Y. Yu, N. Chen, S. Sun, W. Wang, K. M. Lange, B. Zhang, *J. Am. Chem. Soc.*, 140 (2018) 3876-3879.
